# Supplementary material
Source: Springer Nature journal article supplement (https://www.springermedizin.de/resource/supplementary/12876_2013_1117_MOESM4_ESM.pdf/9438518)
Supplement: MOESM4 [file 9438518]

**Table 3: International comparison of the prevalence of faecal incontinence**

| Country                    | Author, year         | Sample Description                                                                                  | Sample Size | Age Selection | Age               |              |                   |              | FI Prevalence (%) |      |      |
|----------------------------|----------------------|-----------------------------------------------------------------------------------------------------|-------------|---------------|-------------------|--------------|-------------------|--------------|-------------------|------|------|
|                            |                      |                                                                                                     |             |               | FI and Non-FI     |              | FI                |              | Female            | Male | Both |
|                            |                      |                                                                                                     |             |               | Mean              | Median       | Mean              | Median       |                   |      |      |
| Japan                      | Nakanishi, 1997 [14] | Elderly recruited from Osaka                                                                        | 1473        | ≥65           | NA                | NA           | NA                | NA           | 6.6               | 8.7  | 7.65 |
| UAE                        | Rizk, 2001 [18]      | Multiparous females recruited from one medical facility                                             | 450         | ≥20           | -                 | -            | 37.9 ± 13.2 years | -            | 11.3              | -    | -    |
| Taiwan                     | Chen, 2003 [15]      | Community survey among women in Central Taiwan                                                      | 1253        | ≥20           | 43.2 ± 15.1 years | -            | -                 | -            | 2.8               | -    | -    |
| Qatar                      | Bener, 2008 [19]     | Women visiting primary health care clinics                                                          | 596         | 40 – 48       | -                 | -            | 45.0 ± 0.9 years  | -            | 10.4              | -    | -    |
| China                      | Ge, 2010 [16]        | Women in 6 districts of Beijing                                                                     | 3058        | 20 – 79       | 48 ± 16 years     | -            | 63 ± 13 years     | -            | 1.28              | -    | -    |
| Korea                      | Kang, 2012 [17]      | Patients who have undergone medical check-up from one medical facility                              | 1149        | 20 – 82       | 44.8 ± 10.2 years | -            | 49.0 ± 10.6 years | -            | 6.8               | 6.2  | 6.4  |
| Malaysia<br>*present study | Roslani, 2013        | Single site, patients and relatives visiting Obstetrics and Gynaecology and General Surgery Clinics | 1000        | 18-84         | -                 | 38(24) years | -                 | 47(28) years | 8.3               | 8.3  | 8.3  |
